# Supplementary material for: BMSCs-laden gelatin/sodium alginate/carboxymethyl chitosan hydrogel for 3D bioprinting
Source: Royal Society of Chemistry journal article supplement (doi:10.1039/c6ra24231f), 2016-01-01
Supplement: c6ra24231f1.pdf [file c6ra24231f1.pdf]

## Supporting Information

### **BMSCs-laden gelatin/sodium alginate/carboxymethyl chitosan hydrogel for 3D bioprinting**

Jie Huang,<sup>a,†</sup> Han Fu,<sup>ad,†</sup> Zhiying Wang,<sup>a</sup> Qingyuan Meng,<sup>b</sup> Sumei Liu,<sup>b</sup> Heran  
Wang,<sup>c</sup> Xiongfei Zheng,<sup>c</sup> Jianwu Da,<sup>\*ab</sup> Zhijun Zhang<sup>\*a</sup>

*<sup>a</sup> Key Laboratory of Nano-Bio Interface, Division of Nanobiomedicine, CAS Center for Excellence in Nanoscience, Suzhou Institute of Nano-Tech and Nano-Bionics, Chinese Academy of Sciences, Suzhou 215123, Jiangsu, P. R. China*

*<sup>b</sup> State Key Laboratory of Molecular Developmental Biology, Institute of Genetics and Developmental Biology, Chinese Academy of Sciences, Beijing 100190, P. R. China*

*<sup>c</sup> State Key Laboratory of Robotics, Shenyang Institute of Automation, Chinese Academy of Sciences, Shenyang 110016, P. R. China*

*<sup>d</sup> University of Chinese Academy of Sciences, 19(A) Yuquan Road, Beijing, 100039, P. R. China*

<sup>†</sup>These authors contributed equally to this work.

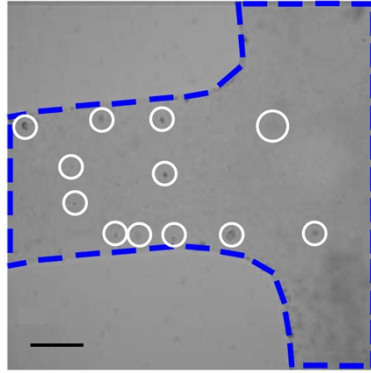

**Figure S1.** Transmission optical image of the printed BMSCs-laden Gel/SA/CMCS hydrogel. The blue dashed line represented the hydrogel boundary. The white circles indicated the cells location. (Scale bar=100  $\mu\text{m}$ )
